# Supplementary material for: Development of accurate coarse-grained force fields for weakly polar groups by an indirect parameterization strategy
Source: Royal Society of Chemistry journal article supplement (doi:10.1039/d1cp00032b), 2021-01-01
Supplement: d1cp00032b1.pdf [file d1cp00032b1.pdf]

Electronic Supplementary Material (ESI) for Physical Chemistry Chemical Physics.

## Development of Accurate Coarse-Grained Force Fields for Weakly Polar Groups by an Indirect Parameterization Strategy

Junjie Song,<sup>a</sup> Mingwei Wan,<sup>ab</sup> Ying Yang,<sup>a</sup> Lianghui Gao,<sup>\*a</sup> and Weihai Fang<sup>ab</sup>

### S1. Direct Parameterization for Molecules from B01 to B04

The bulk phase simulation of a nonpolar molecule (B01 to B04, as listed in Table 1 in the main body) modeled as single CG bead did not meet freezing problem at room temperature. Therefore, the B~B, B~C<sub>4</sub>, B~C<sub>3</sub>, and B~W<sub>d</sub> interactions could be parameterized individually. Here we took *cis*-2-butene (termed as B03) as an example to introduce the optimization procedure for the B~B and B~C<sub>4</sub> interaction parameters. The B03~B03 interaction parameters  $\{\epsilon, R_0, \alpha, \beta\}_{B03\sim B03}$  were optimized by using the meta-MIP algorithm to reproducing the  $\rho$ ,  $\Delta H_{VAP}$ , and  $\Gamma$  of B03. In the first local database Cell 1, sixteen (2<sup>4</sup>) neighboring parameter sets were chosen to encircle the initial parameter set  $P_S = \{4.59 \text{ kJ/mol}, 0.56 \text{ nm}, 9, 15\}$  (see Table S4). The dimension of the cell is set as  $\{\epsilon_{B03\sim B03} \times 2\%, R_{0, B03\sim B03} \times 2\%, \alpha_{B03\sim B03} \times 5\%, \beta_{B03\sim B03} \times 5\%$ . Following the simulation evaluations of these vertexes, the cell resolution was raised by interpolating  $10^4 - 2^4 = 9984$  points. The normal setting of SC={200%, 200%, 200%} combined with RC={lowering the average deviation} was used to concurrently optimize all of the three properties. In four iterations of meta-MIP, an acceptable set of parameters were obtained, which gave a mean error of less than 2% (Figure S1) compared to experimental data.<sup>1-4</sup> In the next step,  $\{\epsilon, R_0, L_0\}_{B03\sim C_4}$  were optimized by matching the  $\rho$ ,  $\Delta H_{VAP}$ , and  $\Gamma$  of B03-C<sub>4</sub> molecule as well as the free energy  $\Delta G_{C_{16}}$  (if experimental available) of B03 solvated in hexadecane. In this step,  $\{\alpha, \beta\}_{B03\sim C_4}$  were obtained by using the combination rule Eq. (5) in the article. The rest B03~C<sub>3</sub> and B03~W<sub>d</sub> interactions were parameterized in the same way as weakly polar molecules B05 to B16. The optimal CG FFs for B01 to B04 were also given in Table 2.

---

<sup>a</sup> Key Laboratory of Theoretical and Computational Photochemistry, Ministry of Education, College of Chemistry, Beijing Normal University, 19 Xin-Jie-Kou-Wai Street, Beijing 100875, China

<sup>b</sup> Institution of Theoretical and Computational Chemistry, School of Chemistry and Chemical Engineering, Nanjing University, Nanjing 210023, China

\*Corresponding author email address: Lianghui Gao (lhgao@bnu.edu.cn)

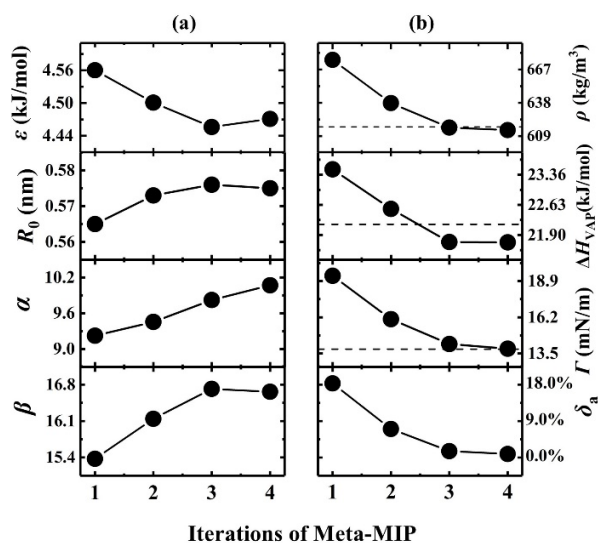

Figure S1 (a) Variations of the force parameters  $\epsilon_{B\sim B}$ ,  $R_{0,B\sim B}$ ,  $\alpha_{B\sim B}$ , and  $\beta_{B\sim B}$  as a function of the iteration of Meta-MIP for *cis*-2-butene. (b) Corresponding properties  $\rho$ ,  $\Delta H_{VAP}$ , and  $\Gamma$ , as well as the mean error  $\delta_a$  predicted by the force parameters as Meta-MIP proceeds. Experimental data are given by dotted lines.<sup>1-4</sup>

Table S1 Morse force  $|F_{1.35}|$  (kJ/mol/nm) at truncation radius of 1.35 nm.

| CG-Name | $ F_{1.35} (B\sim B)$ | $ F_{1.35} (B\sim C_4)$ | $ F_{1.35} (B\sim C_3)$ | $ F_{1.35} (B\sim W_d)$ |
|---------|-----------------------|-------------------------|-------------------------|-------------------------|
| B01     | 2.760E-03             | 2.100E-03               | 2.270E-03               | 8.150E-03               |
| B02     | 2.600E-03             | 2.360E-03               | 2.300E-03               | 7.540E-03               |
| B03     | 2.830E-03             | 3.220E-03               | 2.650E-03               | 7.840E-03               |
| B04     | 4.790E-03             | 3.200E-03               | 3.340E-03               | 1.181E-02               |
| B05     | 3.440E-03             | 4.230E-03               | 2.960E-03               | 8.510E-03               |
| B06     | 7.338E-05             | 1.110E-03               | 2.460E-03               | 2.040E-03               |
| B07     | 1.024E-02             | 8.420E-03               | 8.970E-03               | 1.294E-02               |
| B08     | 1.190E-03             | 2.760E-03               | 1.990E-03               | 6.470E-03               |
| B09     | 9.210E-03             | 7.980E-03               | 8.320E-03               | 1.251E-02               |
| B10     | 3.871E-04             | 1.740E-03               | 2.000E-03               | 4.300E-03               |
| B11     | 7.922E-05             | 1.090E-03               | 9.985E-04               | 2.750E-03               |
| B12     | 2.100E-03             | 6.560E-03               | 7.320E-03               | 7.430E-03               |
| B13     | 9.320E-04             | 2.681E-03               | 3.671E-03               | 5.605E-03               |
| B14     | 3.270E-03             | 4.810E-03               | 7.460E-03               | 8.510E-03               |
| B15     | 3.180E-03             | 3.130E-03               | 3.170E-03               | 9.430E-03               |
| B16     | 6.419E-04             | 1.900E-03               | 1.350E-03               | 4.400E-03               |

Table S2 Thermodynamic properties calculated at various time steps.

| CG<br>Name         | $\rho$ (kg/m <sup>3</sup> ) |      |      |      | $\Delta H_{\text{VAP}}$ (kJ/mol) |      |      |      | $\Gamma$ (mN/m) |      |      |      |
|--------------------|-----------------------------|------|------|------|----------------------------------|------|------|------|-----------------|------|------|------|
|                    | 10fs                        | 30fs | 40fs | 50fs | 10fs                             | 30fs | 40fs | 50fs | 10fs            | 30fs | 40fs | 50fs |
| B02-C <sub>4</sub> | 720                         | 719  | 719  | 718  | 39.2                             | 39.2 | 39.2 | 39.2 | 20.1            | 20.8 | 20.7 | 20.8 |
| B02-C <sub>3</sub> | 712                         | 712  | 711  | 710  | 35.4                             | 35.3 | 35.3 | 35.3 | 19.8            | 19.8 | 20.3 | 19.8 |
| B03-C <sub>4</sub> | 719                         | 718  | 718  | 717  | 39.9                             | 39.9 | 39.9 | 39.8 | 20.6            | 21.0 | 21.3 | 21.0 |
| B03-C <sub>3</sub> | 719                         | 719  | 718  | 718  | 35.6                             | 35.6 | 35.6 | 35.5 | 20.0            | 20.1 | 20.1 | 20.1 |
| B04-C <sub>4</sub> | 769                         | 769  | 768  | 768  | 40.3                             | 40.3 | 40.3 | 40.2 | 22.1            | 22.5 | 21.9 | 22.5 |
| B04-C <sub>3</sub> | 761                         | 761  | 760  | 760  | 36.1                             | 36.1 | 36.0 | 36.0 | 21.8            | 21.4 | 21.5 | 21.4 |
| B05-C <sub>4</sub> | 749                         | 749  | 749  | 748  | 43.3                             | 43.2 | 43.2 | 43.2 | 25.1            | 25.5 | 25.8 | 25.5 |
| B05-C <sub>3</sub> | 763                         | 762  | 762  | 761  | 38.3                             | 38.2 | 38.2 | 38.2 | 24.5            | 24.4 | 24.5 | 24.4 |
| B06-C <sub>4</sub> | 879                         | 879  | 878  | 878  | 42.4                             | 42.3 | 42.4 | 42.3 | 24.6            | 24.4 | 24.5 | 24.4 |
| B06-C <sub>3</sub> | 864                         | 863  | 862  | 862  | 38.5                             | 38.4 | 38.5 | 38.4 | 23.6            | 23.8 | 23.4 | 23.8 |
| B07-C <sub>4</sub> | 862                         | 862  | 862  | 861  | 47.0                             | 47.0 | 46.9 | 46.9 | 27.4            | 27.7 | 27.7 | 27.7 |
| B07-C <sub>3</sub> | 865                         | 865  | 865  | 864  | 42.2                             | 42.2 | 42.1 | 42.1 | 27.0            | 26.8 | 26.6 | 26.8 |
| B08-C <sub>4</sub> | 801                         | 800  | 800  | 800  | 47.1                             | 47.0 | 47.0 | 46.9 | 27.0            | 26.9 | 26.3 | 26.9 |
| B08-C <sub>3</sub> | 823                         | 823  | 822  | 821  | 42.1                             | 42.0 | 42.0 | 42.0 | 26.7            | 26.6 | 26.5 | 26.6 |
| B09-C <sub>4</sub> | 1124                        | 1123 | 1123 | 1123 | 48.2                             | 48.1 | 48.1 | 48.1 | 27.9            | 27.8 | 27.8 | 27.8 |
| B09-C <sub>3</sub> | 1165                        | 1165 | 1165 | 1164 | 43.8                             | 43.8 | 43.8 | 43.8 | 27.8            | 27.8 | 27.6 | 27.8 |
| B10-C <sub>4</sub> | 810                         | 810  | 809  | 809  | 46.8                             | 46.8 | 46.8 | 46.7 | 25.1            | 25.5 | 24.8 | 25.5 |
| B10-C <sub>3</sub> | 812                         | 812  | 811  | 810  | 42.9                             | 42.9 | 42.8 | 42.8 | 25.4            | 25.2 | 25.1 | 25.2 |
| B11-C <sub>4</sub> | 761                         | 761  | 760  | 760  | 49.5                             | 49.4 | 49.4 | 49.3 | 25.6            | 24.3 | 24.8 | 24.3 |
| B11-C <sub>3</sub> | 763                         | 762  | 762  | 761  | 44.7                             | 44.6 | 44.6 | 44.5 | 24.5            | 24.7 | 24.7 | 24.7 |
| B12-C <sub>4</sub> | 1170                        | 1170 | 1169 | 1169 | 48.4                             | 48.3 | 48.3 | 48.3 | 28.3            | 27.9 | 28.3 | 27.9 |
| B12-C <sub>3</sub> | 1217                        | 1216 | 1216 | 1215 | 43.8                             | 43.8 | 43.8 | 43.8 | 27.3            | 28.0 | 27.5 | 28.0 |
| B13-C <sub>4</sub> | 836                         | 836  | 836  | 835  | 48.5                             | 48.5 | 48.5 | 48.4 | 26.4            | 26.3 | 26.4 | 25.5 |
| B13-C <sub>3</sub> | 828                         | 828  | 828  | 827  | 44.4                             | 44.4 | 44.4 | 44.3 | 25.7            | 26.1 | 25.1 | 25.7 |
| B14-C <sub>4</sub> | 849                         | 848  | 848  | 848  | 49.7                             | 49.6 | 49.6 | 49.6 | 27.5            | 27.9 | 28.0 | 27.9 |
| B14-C <sub>3</sub> | 831                         | 831  | 831  | 830  | 45.2                             | 45.2 | 45.2 | 45.2 | 26.6            | 27.2 | 26.8 | 27.2 |
| B15-C <sub>4</sub> | 795                         | 795  | 794  | 794  | 51.2                             | 51.2 | 51.1 | 51.1 | 28.8            | 28.7 | 28.4 | 28.7 |
| B15-C <sub>3</sub> | 795                         | 795  | 794  | 793  | 46.6                             | 46.6 | 46.5 | 46.5 | 28.6            | 27.9 | 28.3 | 27.9 |
| B16-C <sub>4</sub> | 928                         | 927  | 927  | 926  | 49.5                             | 49.5 | 49.5 | 49.4 | 27.8            | 27.6 | 27.8 | 27.6 |
| B16-C <sub>3</sub> | 985                         | 984  | 984  | 983  | 44.9                             | 44.8 | 44.8 | 44.8 | 28.6            | 28.4 | 28.1 | 28.4 |

Data in black, blue, and green mean the relative deviation from experiment (ref [1-4]) is in the range of  $\delta < 2.5\%$ ,  $2.5\% \leq \delta < 5.0\%$ , and  $5.0\% \leq \delta \leq 7.0\%$ , respectively.

Table S3 Effect of time step on the ratio of the average fluctuations in total and potential energy  $\Delta E_T/\Delta E_P$  for pure B01, B02, B03, and B04 bulks. Results were obtained from simulations in NVE ensemble containing 3200 particles. Simulations were performed for 2 ns simulations and the last 1 ns was used for analyses.

| Time steps | B01, NVE     |              |                         | B02 NVE      |              |                         |
|------------|--------------|--------------|-------------------------|--------------|--------------|-------------------------|
|            | $\Delta E_P$ | $\Delta E_T$ | $\Delta E_T/\Delta E_P$ | $\Delta E_P$ | $\Delta E_T$ | $\Delta E_T/\Delta E_P$ |
| 1fs        | 120.2        | 0.3          | 0.002                   | 121.1        | 0.3          | 0.003                   |
| 5fs        | 118.6        | 0.5          | 0.004                   | 121.0        | 0.4          | 0.003                   |
| 10fs       | 121.0        | 2.8          | 0.023                   | 117.5        | 2.1          | 0.018                   |
| 20fs       | 121.3        | 14.8         | 0.122                   | 119.8        | 17.9         | 0.149                   |
| 30fs       | 126.6        | 63.8         | 0.504                   | 139.8        | 132.3        | 0.946                   |
| 40fs       | 182.7        | 258.8        | 1.417                   | 237.3        | 395.8        | 1.668                   |
| 50fs       | 477.9        | 934.8        | 1.956                   | 628.3        | 1226.7       | 1.952                   |

  

| Time steps | B03, NVE     |              |                         | B04, NVE     |              |                         |
|------------|--------------|--------------|-------------------------|--------------|--------------|-------------------------|
|            | $\Delta E_P$ | $\Delta E_T$ | $\Delta E_T/\Delta E_P$ | $\Delta E_P$ | $\Delta E_T$ | $\Delta E_T/\Delta E_P$ |
| 1fs        | 122.2        | 0.4          | 0.003                   | 122.2        | 0.5          | 0.004                   |
| 5fs        | 123.6        | 0.3          | 0.002                   | 119.9        | 0.4          | 0.003                   |
| 10fs       | 121.4        | 1.3          | 0.011                   | 122.8        | 0.7          | 0.006                   |
| 20fs       | 122.4        | 15.3         | 0.125                   | 124.5        | 7.0          | 0.056                   |
| 30fs       | 131.6        | 87.9         | 0.668                   | 130.1        | 55.9         | 0.430                   |
| 40fs       | 180.8        | 244.3        | 1.352                   | 143.9        | 132.8        | 0.922                   |
| 50fs       | 465.9        | 902.3        | 1.937                   | 238.6        | 390.5        | 1.637                   |

Table S4 Initial force parameters for sixteen studied molecules or functional groups.

| Type | $L_{0, B-C_4}$<br>(nm) | $\epsilon_{B-B}$<br>(kJ/mol) | $R_{0, B-B}$<br>(nm) | $\alpha_{B-B}$ | $\beta_{B-B}$ | Type | $L_{0, B-C_4}$<br>(nm) | $\epsilon_{B-B}$<br>(kJ/mol) | $R_{0, B-B}$<br>(nm) | $\alpha_{B-B}$ | $\beta_{B-B}$ |
|------|------------------------|------------------------------|----------------------|----------------|---------------|------|------------------------|------------------------------|----------------------|----------------|---------------|
| B01  | 0.44                   | 4.32                         | 0.55                 | 9              | 15            | B09  | 0.44                   | 6.25                         | 0.56                 | 9              | 15            |
| B02  | 0.44                   | 4.44                         | 0.56                 | 9              | 15            | B10  | 0.43                   | 6.42                         | 0.52                 | 9              | 15            |
| B03  | 0.44                   | 4.59                         | 0.56                 | 9              | 15            | B11  | 0.44                   | 6.48                         | 0.54                 | 9              | 15            |
| B04  | 0.44                   | 4.73                         | 0.55                 | 9              | 15            | B12  | 0.43                   | 6.48                         | 0.54                 | 9              | 15            |
| B05  | 0.43                   | 5.53                         | 0.53                 | 9              | 15            | B13  | 0.44                   | 6.60                         | 0.56                 | 9              | 15            |
| B06  | 0.42                   | 5.88                         | 0.49                 | 9              | 15            | B14  | 0.44                   | 6.61                         | 0.56                 | 9              | 15            |
| B07  | 0.44                   | 5.88                         | 0.56                 | 9              | 15            | B15  | 0.42                   | 7.47                         | 0.51                 | 9              | 15            |
| B08  | 0.43                   | 6.14                         | 0.52                 | 9              | 15            | B16  | 0.41                   | 7.93                         | 0.47                 | 9              | 15            |

The initial bond lengths  $L_{0, B-C_4}$  were estimated by using the relations of  $L_{0, B-B} = L_{0, C_4-C_4} \times R_{0, B-B} / R_{0, C_4-C_4}$  and  $L_{0, B-C_4} = (L_{0, B-B} + L_{0, C_4-C_4}) / 2$ . Since the B-B dimer might not stably exist, the bond length  $L_{0, B-B}$  only served as an intermediate parameter herein for the convenience of calculation.

Table S5 Thermodynamic properties predicted by a large system performed for 1000 ns.

| Molecules          | $\rho$ (kg/m <sup>3</sup> ) |      |              | $\Delta H_{\text{VAP}}$ (kJ/mol) |                    |              | $\Gamma$ (mN/m) |                   |              |
|--------------------|-----------------------------|------|--------------|----------------------------------|--------------------|--------------|-----------------|-------------------|--------------|
|                    | Sim                         | Exp  | $\delta$ (%) | Sim                              | Exp                | $\delta$ (%) | Sim             | Exp               | $\delta$ (%) |
| B02-C <sub>4</sub> | 719                         | 716  | 0.4          | 39.2                             | 40.2 <sup>b</sup>  | 2.5          | 20.4            | 20.9              | 2.4          |
| B02-C <sub>3</sub> | 712                         | 697  | 2.2          | 35.4                             | 36.3 <sup>a</sup>  | 2.5          | 19.8            | 20.5              | 3.4          |
| B03-C <sub>4</sub> | 718                         | 720  | 0.3          | 39.9                             | 40.2 <sup>b</sup>  | 0.7          | 20.9            | 22.1              | 5.4          |
| B03-C <sub>3</sub> | 719                         | 703  | 2.3          | 35.6                             | 36.3 <sup>a</sup>  | 1.9          | 20.2            | 20.9              | 3.3          |
| B04-C <sub>4</sub> | 769                         | 768* | 0.1          | 40.3                             | 41.5 <sup>a*</sup> | 2.9          | 22.2            | 22.2*             | 0.0          |
| B04-C <sub>3</sub> | 760                         | 750* | 1.3          | 36.1                             | 36.6 <sup>a*</sup> | 1.4          | 21.4            | 20.8*             | 2.9          |
| B05-C <sub>4</sub> | 749                         | 755  | 0.8          | 43.3                             | 43.2               | 0.2          | 25.3            | 26.7              | 5.2          |
| B05-C <sub>3</sub> | 762                         | 745  | 2.3          | 38.3                             | 38.9               | 1.5          | 24.7            | 26.0              | 5.0          |
| B06-C <sub>4</sub> | 879                         | 883* | 0.5          | 42.4                             | 44.1 <sup>a*</sup> | 3.9          | 24.6            | 25.7*             | 4.3          |
| B06-C <sub>3</sub> | 863                         | 890* | 3.0          | 38.5                             | 40.3 <sup>a*</sup> | 4.5          | 23.7            | 24.6*             | 3.7          |
| B07-C <sub>4</sub> | 862                         | 872  | 1.1          | 47.0                             | 47.7 <sup>a</sup>  | 1.5          | 27.5            | 27.0              | 1.9          |
| B07-C <sub>3</sub> | 865                         | 874  | 1.0          | 42.2                             | 42.8 <sup>a</sup>  | 1.4          | 26.8            | 26.2              | 2.3          |
| B08-C <sub>4</sub> | 801                         | 813  | 1.5          | 47.0                             | 48.7 <sup>b</sup>  | 3.5          | 27.0            | 26.3              | 2.7          |
| B08-C <sub>3</sub> | 823                         | 810  | 1.6          | 42.0                             | 42.3 <sup>b</sup>  | 0.7          | 26.5            | 27.9              | 5.0          |
| B09-C <sub>4</sub> | 1124                        | 1122 | 0.2          | 48.1                             | 47.4               | 1.5          | 27.8            | 29.0              | 4.1          |
| B09-C <sub>3</sub> | 1165                        | 1160 | 0.4          | 43.8                             | 44.3               | 1.1          | 27.8            | 28.7              | 3.1          |
| B10-C <sub>4</sub> | 810                         | 810  | 0.0          | 46.8                             | 47.2 <sup>a</sup>  | 0.8          | 25.3            | 25.8              | 1.9          |
| B10-C <sub>3</sub> | 812                         | 807  | 0.6          | 42.9                             | 43.1 <sup>a</sup>  | 0.5          | 25.2            | 25.3              | 0.4          |
| B11-C <sub>4</sub> | 761                         | 772  | 1.4          | 49.5                             | 50.0 <sup>a</sup>  | 1.0          | 25.3            | 24.0              | 5.4          |
| B11-C <sub>3</sub> | 763                         | 761  | 0.3          | 44.7                             | 45.1 <sup>a</sup>  | 0.9          | 24.5            | 25.8              | 5.0          |
| B12-C <sub>4</sub> | 1170                        | 1184 | 1.2          | 48.3                             | 49.6               | 2.6          | 27.8            | 29.1              | 4.5          |
| B12-C <sub>3</sub> | 1217                        | 1231 | 1.1          | 43.8                             | 45.3               | 3.3          | 27.6            | 29.2              | 5.5          |
| B13-C <sub>4</sub> | 836                         | 839* | 0.4          | 48.5                             | 49.5 <sup>a#</sup> | 2.0          | 26.3            | 25.4 <sup>#</sup> | 3.5          |
| B13-C <sub>3</sub> | 828                         | 836* | 1.0          | 44.4                             | 44.9 <sup>a*</sup> | 1.1          | 26.0            | 25.9*             | 0.4          |
| B14-C <sub>4</sub> | 849                         | 839  | 1.2          | 49.6                             | 49.4 <sup>b</sup>  | 0.4          | 27.9            | 27.3              | 2.2          |
| B14-C <sub>3</sub> | 831                         | 837  | 0.7          | 45.2                             | 44.7 <sup>a</sup>  | 1.1          | 27.1            | 27.5              | 1.5          |
| B15-C <sub>4</sub> | 795                         | 806  | 1.4          | 51.2                             | 52.2 <sup>a#</sup> | 1.9          | 28.3            | 27.8              | 1.8          |
| B15-C <sub>3</sub> | 795                         | 801  | 0.7          | 46.6                             | 47.9 <sup>a</sup>  | 2.7          | 28.3            | 27.4              | 3.3          |
| B16-C <sub>4</sub> | 928                         | 949  | 2.2          | 49.5                             | 50.3 <sup>b</sup>  | 1.6          | 27.9            | 29.3              | 4.8          |
| B16-C <sub>3</sub> | 985                         | 968  | 1.8          | 44.9                             | 47.0 <sup>b</sup>  | 4.5          | 28.5            | 29.8              | 4.4          |

Unlabeled experimental data are from ref [1].

<sup>a</sup>Data from ref [3].

<sup>b</sup>Data from ref [4].

\*Data obtained by averaging properties of two isomers.

#Data obtained by fitting the properties of corresponding homologues.

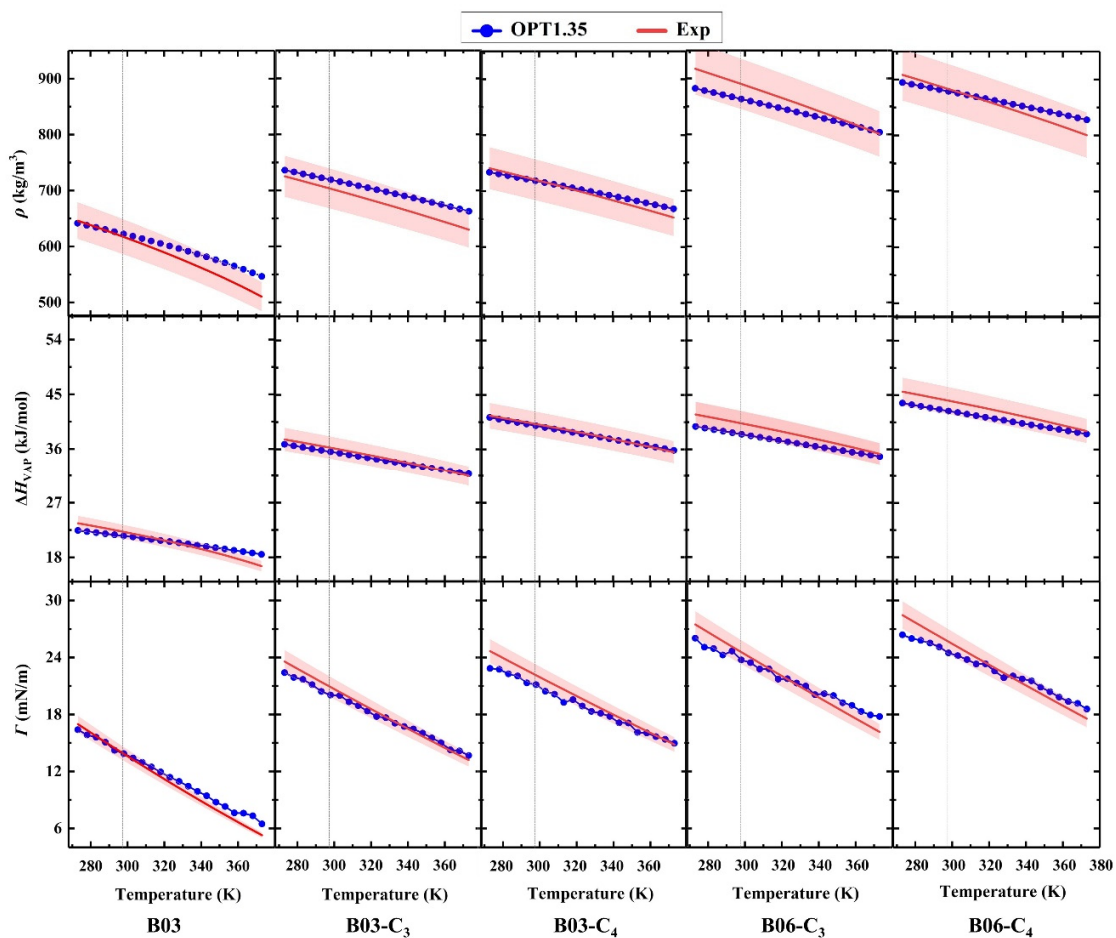

Figure S2 Thermodynamic properties  $\rho$ ,  $\Delta H_{VAP}$  and  $\Gamma$  of the homologs of B03 and B06 at temperatures from 273 K to 373 K. The experimental data were derived from ref [1] and  $\Delta H_{VAP}$  were corrected at 298 K [3]. The shadow indicates the deviation range of  $\pm 5\%$  from experimental data.

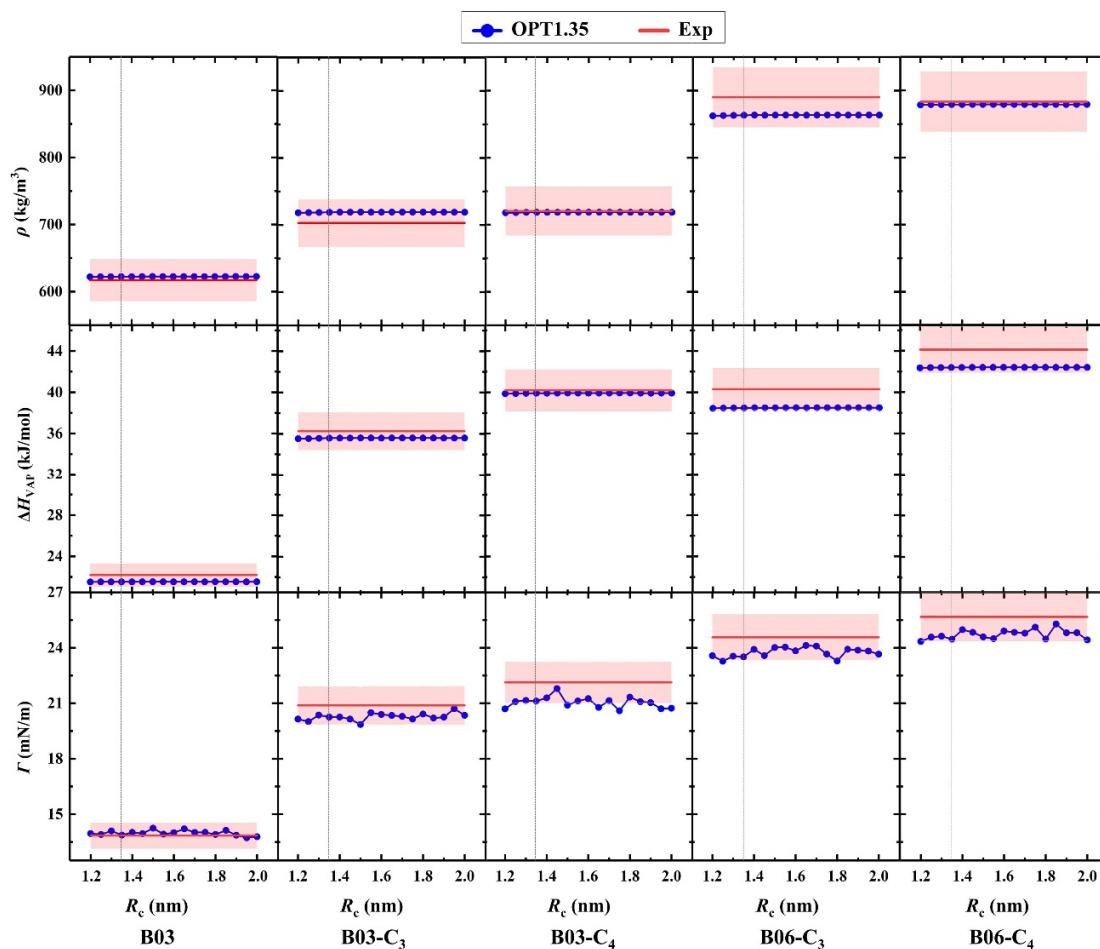

Figure S3 Thermodynamic properties  $\rho$ ,  $\Delta H_{VAP}$  and  $\Gamma$  of the homologs of B03 and B06 at truncation distance  $R_c$  from 1.20 nm to 2.00 nm. The shadow indicates the deviation range of  $\pm 5\%$  from experimental data [1,3].

Table S6 Density  $\rho$  and heat of vaporization  $\Delta H_{\text{VAP}}$  of fatty acid methyl esters calculated from simulations by using the OPT1.35 FF, as well as measured in experiment (Exp).

| Molecules             | CG-Names                                                               | $\rho$ (kg/m <sup>3</sup> ) |                  | $\Delta H_{\text{VAP}}$ (kJ/mol) |                  |
|-----------------------|------------------------------------------------------------------------|-----------------------------|------------------|----------------------------------|------------------|
|                       |                                                                        | Sim                         | Exp <sup>a</sup> | Sim                              | Exp <sup>b</sup> |
| methyl-heptanoate     | B06-C <sub>3</sub> -C <sub>3</sub>                                     | 848                         | 877              | 54.6                             | 51.8             |
| methyl-octanoate      | B06-C <sub>4</sub> -C <sub>3</sub>                                     | 859                         | 873              | 57.9                             | 56.9             |
| methyl-nonanoate      | B06-C <sub>4</sub> -C <sub>4</sub>                                     | 864                         | 871              | 62.4                             | 61.6             |
| methyl-decanoate      | B06-C <sub>3</sub> -C <sub>3</sub> -C <sub>3</sub>                     | 839                         | 869              | 70.5                             | 66.1             |
| methyl-undecanoate    | B06-C <sub>4</sub> -C <sub>3</sub> -C <sub>3</sub>                     | 848                         | 867              | 74.1                             | 70.8             |
| methyl-dodecanoate    | B06-C <sub>4</sub> -C <sub>4</sub> -C <sub>3</sub>                     | 854                         | 869              | 77.8                             | 76.6             |
| methyl-tridecanoate   | B06-C <sub>4</sub> -C <sub>4</sub> -C <sub>4</sub>                     | 860                         | 859              | 82.9                             | 80.0             |
| methyl-tetradecanoate | B06-C <sub>4</sub> -C <sub>3</sub> -C <sub>3</sub> -C <sub>3</sub>     | 842                         | 863              | 90.4                             | 85.9             |
| methyl-pentadecanoate | B06-C <sub>4</sub> -C <sub>4</sub> -C <sub>3</sub> -C <sub>3</sub>     | 848                         | 862              | 94.3                             | 89.3             |
| methyl-linoleate      | B06-C <sub>3</sub> -C <sub>3</sub> -B03-B03-C <sub>3</sub>             | 881                         | 889              | 108.3                            | 102.2            |
| methyl-oleate         | B06-C <sub>3</sub> -C <sub>3</sub> -B03-C <sub>4</sub> -C <sub>3</sub> | 860                         | 870              | 108.5                            | 103.3            |

<sup>a</sup>Experimental  $\rho$  from ref [1].

<sup>b</sup>Experimental  $\Delta H_{\text{VAP}}$  from ref [4].

Calculated data in black, blue, and green denote that they have deviations from experiment in the range of  $\delta < 2.5\%$ ,  $2.5\% \leq \delta < 5.0\%$ , and  $5.0\% \leq \delta \leq 7.0\%$ , respectively.



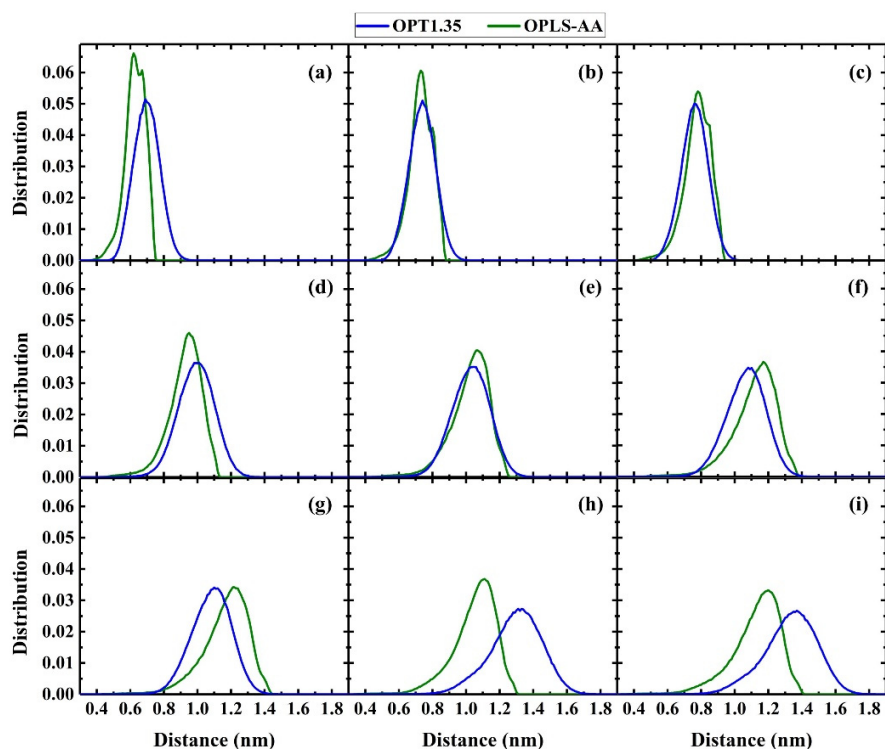

Figure S4 End-to-end distance distribution for methyl-heptanoate (a), methyl-octanoate (b), methyl-nonanoate (c), methyl-decanoate (d), methyl-undecanoate (e), methyl-dodecanoate (f), methyl-tridecanoate (g), methyl-tetradecanoate (h), and methyl-pentadecanoate(i) single chains obtained from CG and AA-mapped trajectories, respectively.

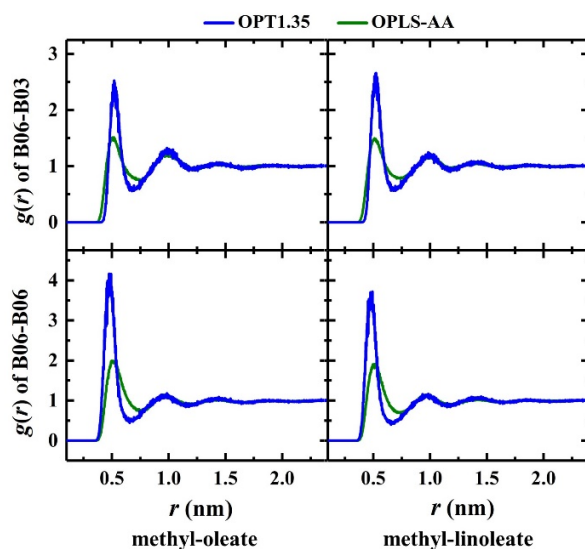

Figure S5 Radial distribution functions  $g(r)$  of intermolecular B06~B03 and B06~B06 pairs in methyl-oleate and methyl-linoleate bulks.

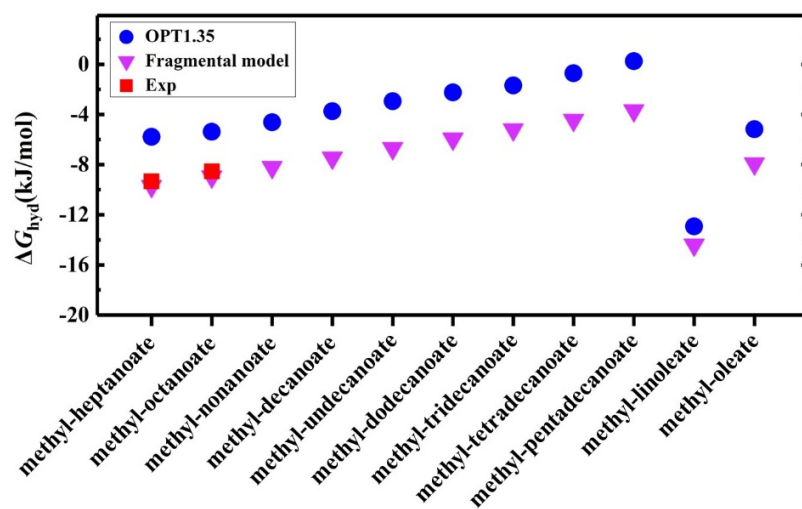

Figure S6 Hydration free energy  $\Delta G_{\text{hyd}}$  of FAMES. Data predicted by OPT 1.35 FF were compared to those estimated by fragmental model [5]. The experimental data for methyl-heptanoate and methyl-octanoate are from ref [6].

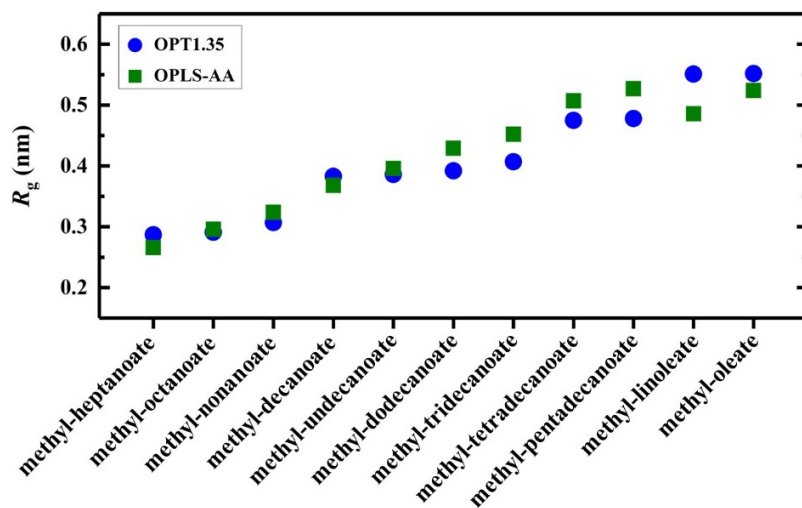

Figure S7 Radius of gyration of FAMES in water.

## Reference

1. C. L. Yaws, *Thermophysical properties of chemicals and hydrocarbons*. 2 ed.; William Andrew: Beaumont, **2014**.
2. C. L. Yaws, *The Yaws handbook of vapor pressure: Antoine coefficients*. 2 ed.; Gulf Professional Publishing: Houston, **2015**.
3. J. Rumble, *CRC Handbook of Chemistry and Physics*. 97 ed.; CRC press: Boca Raton, **2017**.
4. J. S. Chickos, W. E. A., Enthalpies of Vaporization of Organic and Organometallic Compounds, 1880–2002. *J. Phys. Chem. Ref. Data* **2002**, *32*, 519.
5. Pepe, G.; Guiliani, G.; Loustalet, S.; Halfon, P., Hydration free energy a fragmental model and drug design. *European Journal of Medicinal Chemistry* **2002**, *37* (11), 865-872.
6. A. V. Marenich, C. P. K., J. D. Thompson, G. D. Hawkins, C. C. Chambers, D. J. Giesen, P. Winget, C. J. Cramer, D. G. Truhlar Minnesota Solvation Database – version 2012, University of Minnesota, Minneapolis, **2012**.
